# Supplementary material
Source: publisher figshare collection journal article supplement (https://acs.figshare.com/ndownloader/files/4693054)
Supplement: Supplementary file 1 [file 4693054]

## SUPPORTING INFORMATION

### 2-[*p*-3-(ter(9,9-bis(2-methyl-butyl)fluoren-7-yl)propyl-phenyl]-4,6-diphenyl-triazine, **TRZ-1F(MB)3**.

Into the mixture of **1** (0.098 g, 0.37 mmol), **2** (0.42 g, 0.39 mmol), Pd(PPh<sub>3</sub>)<sub>4</sub> (10 mg, 0.0086 mmol), and Na<sub>2</sub>CO<sub>3</sub> (0.64 g, 6.1 mmol) were added toluene (5 ml) and H<sub>2</sub>O (3 ml). The reaction mixture was stirred at 90 °C for 2 days. Upon cooling to room temperature, methylene chloride (50. ml) was added to the reaction mixture. The organic layer was separated and washed with brine before drying over anhydrous MgSO<sub>4</sub>. Upon evaporating off the solvent, the residue was purified with column chromatography on silica gel with hexanes:methylene chloride (5:1) as the eluent to yield **TRZ-1F(MB)3** (0.18 g, 39 %) as a white solid. <sup>1</sup>H-NMR (400 MHz, CDCl<sub>3</sub>): δ (ppm) 8.80-8.83 (d, 4H), 8.73-8.75 (d, 2H), 7.76-7.84 (m, 5H), 7.59-7.71 (m, 15H), 7.31-7.44 (m, 5H), 7.21-7.27 (m, 2H), 2.80-2.84 (t, 4H), 2.11-2.25 (m, 8H), 1.93-1.98 (m, 6H), 0.60-1.01 (m, 36H), 0.30-0.45 (m, 18H). Molecular weight calcd. for C<sub>237</sub>H<sub>285</sub>N<sub>3</sub>: 1264.9. MALD/I TOF MS (DCTB) *m/z* ([M]<sup>+</sup>): 1264.0. Anal. Calcd. C<sub>237</sub>H<sub>285</sub>N<sub>3</sub>: C, 88.31; H, 8.37; N, 3.32. Found: C, 88.11; H, 8.34; N, 3.27. Residual halogen levels (ppm): I ≤ 5; Br ≤ 20, Cl ≤ 20.

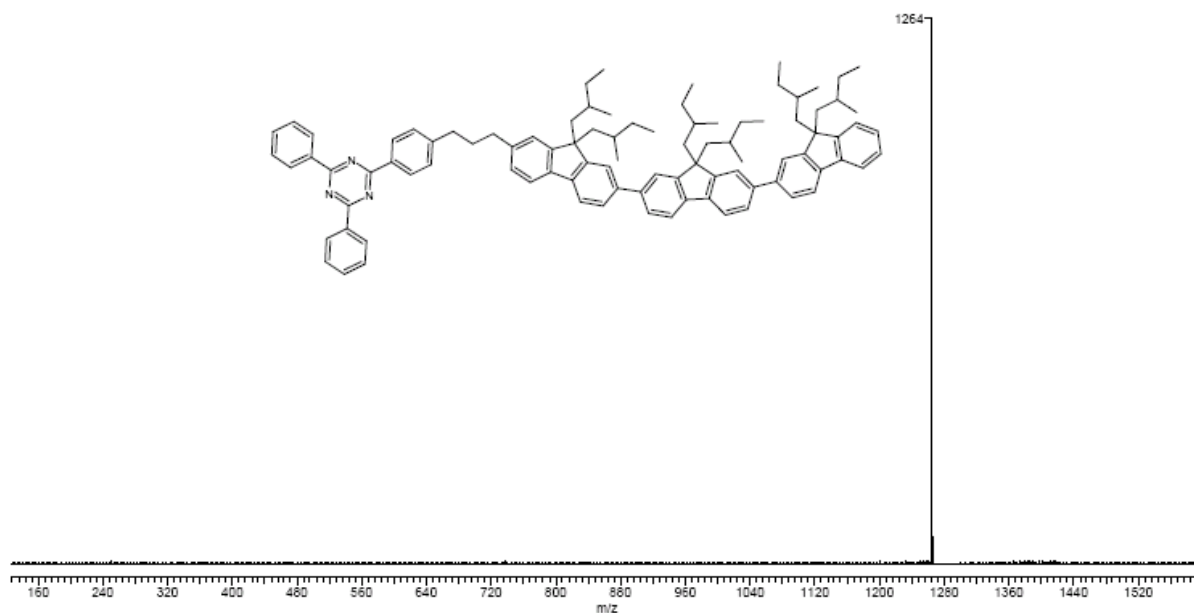

Figure 1. Positive ion MALD/I TOF MS spectrum of TRZ(1)-F(MB)3 using DCTB as the matrix. The spectrum represents the summation of scans from > 100 laser shots collected by rastering various positions of the sample. The peak at *m/z* 1264 is consistent with the molecular ion for the expected product structure.

Figure S-1. MALD/I TOF mass spectrum of **TRZ-1F(MB)3** using DCTB as a matrix.

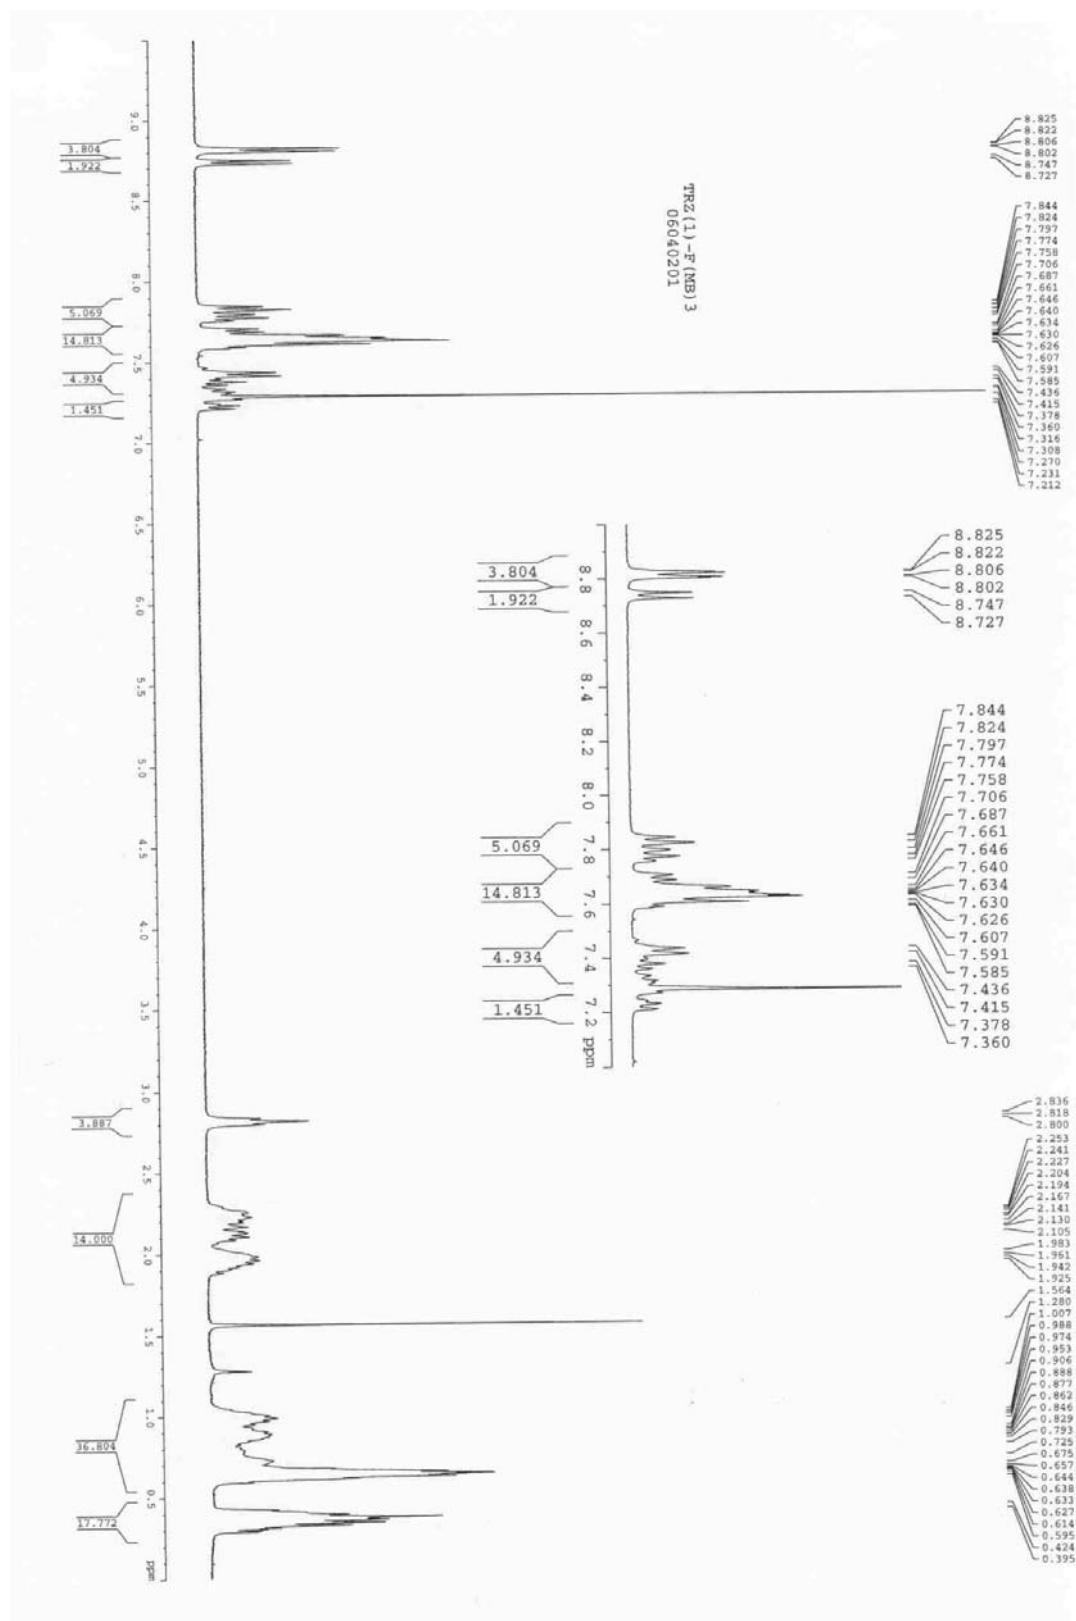

Figure S-2.  $^1\text{H}$ -NMR spectra (400 MHz) of **TRZ-1F(MB)3** in  $\text{CDCl}_3$ .

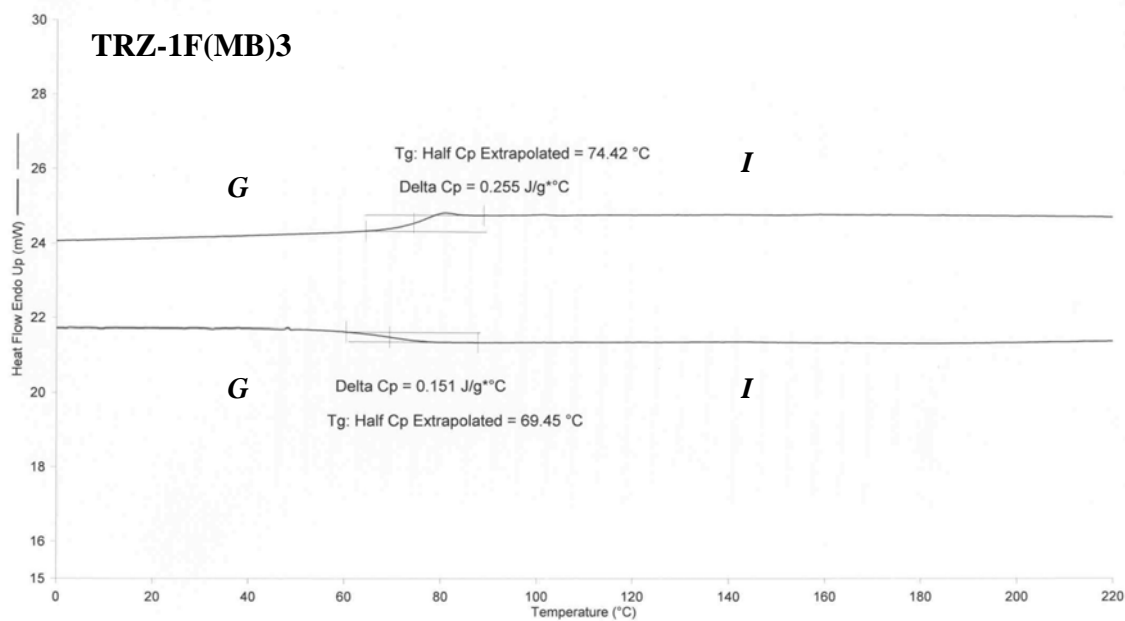

Figure S-3. Second heating and cooling DSC thermograms at  $\pm 20^{\circ}\text{C}$  per minute for **TRZ-1F(MB)3**. *G*, Glassy; *I*, Isotropic.
